# Supplementary material for: Uranium mining – challenges and lessons to learn for nuclear disposal in view of participation and safety
Source: Copernicus journal article supplement (doi:10.5194/sand-2-255-2023), 2023-09-06
Supplement: Supplementary file 2 [file sand-2-255-2023-supplement.zip]

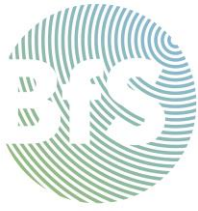

Federal Office for  
Radiation Protection

# Aims and results of the German uranium miners cohort study

**Veronika Deffner**, Nora Fenske, Maria Schnelzer, Michaela Kreuzer

Department „Effects and risks of ionizing and non-ionizing radiation“

Federal Office for Radiation Protection (BfS), Germany

safe<sup>ND</sup> - Interdisciplinary research symposium on the safety of nuclear disposal practices  
13-15 September 2023, Berlin, Germany

## German uranium miners cohort study – *Kreuzer et al. 2010, 2023*

### Study aims

1. Investigating the health consequences of employment in German uranium mines
2. Assess health risks of occupational exposure to radiation and dust

### Study cohort

58,972 male former employees of the Wismut uranium mining company (operating from 1946 to 1990 in Saxony and Thuringia)

- Largest single cohort study of uranium miners

### Chronology of mining and mortality follow-ups

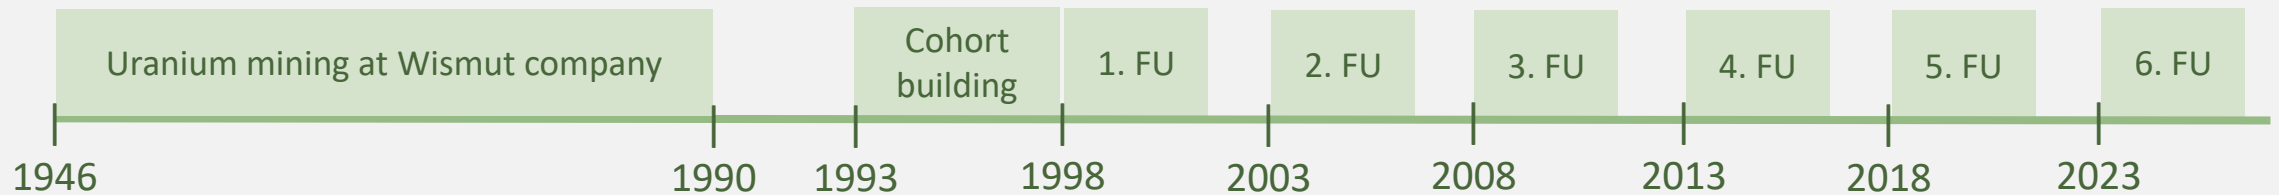

### Risk factors

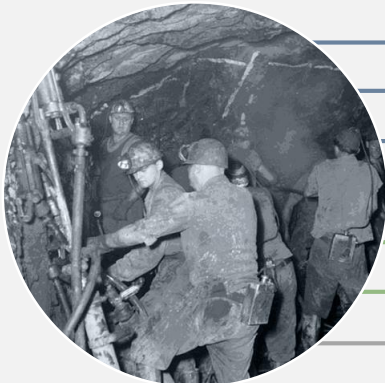

- Radon progeny
- External gamma radiation
- Long-lived radionuclides
- Silica dust
- Fine dust
- Arsenic dust
- Smoking

### Vital status (by end of 2018)

|                    |                 |
|--------------------|-----------------|
| Alive:             | 23,330 (39.6 %) |
| Deceased:          | 33,794 (57.3 %) |
| Loss to follow-up: | 1,848 (3.1 %)   |

## Mortality in comparison to the general population – *Kreuzer et al. 2021*

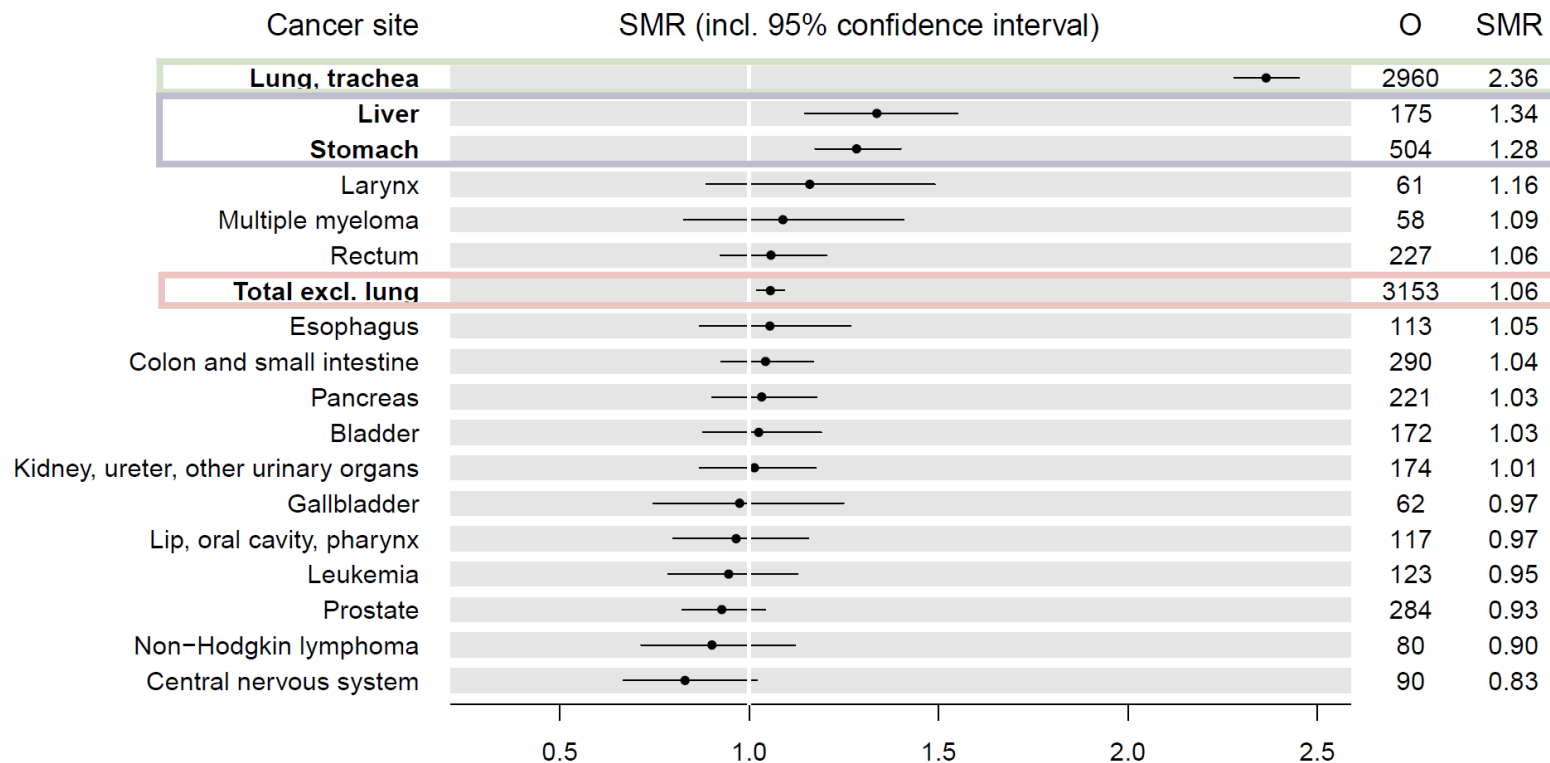

**Lung cancer** mortality in the cohort is 2.36-fold significantly higher than in the general population.

Of the 27 considered cancer sites other than lung, SMR was significantly increased for **liver and stomach cancer**.

The SMR for **cancer causes of death excluding lung cancer** is significantly increased.

→ **Explanation ?**  
→ **Analysis of exposure-response relationships**

Standardized mortality ratio (SMR)

Observed number of  
deaths in the cohort (O)

vs.

Expected number of deaths in the cohort, if mortality  
rates are based on those of the general population

## Health risks of occupational exposure to radiation and dust

### Radon & lung cancer

*Kreuzer et al. 2023*

- **Linear, positive relationship** between radon exposure and lung cancer risk
- The relative risk of lung cancer decreases with increasing time since exposure, attained age and exposure rate.
- Increased lung cancer risk by radon for former miners even 20 to 30 years after the mines were closed
- Higher risk estimates at low exposures and exposure rates

### Radon & cancers other than lung cancer

*To appear*

- Linear, positive relationship between radon exposure and risk of cancers other than lung cancer
- Majority of relationships between radon exposure and cancer risk at individual sites are positive (not sign.)
- Excess risk is low, i.e. no substantial risk below 1,000 WLM

### Silica dust & respiratory diseases

*Kreuzer et al. 2013,  
Sogl et al. 2012*

- Linear, positive relationship between silica dust exposure and **lung cancer** for high cumulative silica dust exposures
- Strong, positive relationship between silica dust exposure and **silicosis**
- No relationship between silica dust exposure (or radon exposure) and COPD or other non-malignant respiratory diseases

### Working Level Months (WLM)

Unit for the measurement of occupational radon exposure

53 WLM corresponds to about 300 Bq/m<sup>3</sup> of residential radon exposure over 40 years.

## PUMA: Pooled Uranium Miners Analysis

### Study aims - *Rage et al. 2020*

1. Strengthen the basis for radiation protection
2. Address novel research questions that might not be feasible to address in any single cohort of uranium miners
3. Improve the understanding of radon and radon progeny-related diseases

### Study cohort - *Rage et al. 2020, Kelly-Reif et al. 2023*

| Cohort (country)       | Period of follow-up | Number miners | Number lung cancer deaths | Mean cum. radon exposure in WLM |
|------------------------|---------------------|---------------|---------------------------|---------------------------------|
| Eldorado (Canada)      | 1950-1999           | 13,574        | 517                       | 122                             |
| Ontario (Canada)       | 1954-2007           | 28,546        | 1,246                     | 31                              |
| Czech (Czech Rep.)     | 1952-2014           | 9,978         | 1,176                     | 73                              |
| France (France)        | 1946-2007           | 5,086         | 213                       | 37                              |
| Wismut (Germany)       | 1946-2013           | 54,919        | 3,759                     | 304                             |
| Colorado Plateau (USA) | 1960-2005           | 4,137         | 612                       | 579                             |
| New Mexico (USA)       | 1957-2012           | 3,469         | 231                       | 90                              |
| PUMA                   | 1946-2014           | 119,709       | 7,754                     | 119                             |

### Radon & lung cancer

*Richardson et al. 2022,  
Kelly-Reif et al. 2023,  
Kreuzer et al. (submitted)*

- Confirmation of a linear, positive relationship between radon exposure and lung cancer risk
- Support of the modification of the relationship by time since exposure, attained age and exposure rate
- Improved precision of risk estimates in comparison to previous results
- 5.7 % to 8.6 % of people exposed to 2 WLM from age 18 to 64 die on average of lung cancer due to this occupational radon exposure  
(based on models for more recent periods with chronic low exposures and exposure rates)

## Literature

- Kelly-Reif K, Bertke SJ, Rage E, Demers PA, Fenske N, Deffner V, Kreuzer M, Samet J, Schubauer-Berigan MK, Tomasek L. 2023. Radon and lung cancer in the pooled uranium miners analysis (PUMA): highly exposed early miners and all miners. *Occupational and Environmental Medicine*, 80(7), 385-391.
- Kreuzer M, Schnelzer M, Tschense A, Walsh L, Grosche B. 2010. Cohort profile: the German uranium miners cohort study (WISMUT cohort), 1946–2003. *International Journal of Epidemiology*, 39(4), 980-987.
- Kreuzer M, Sogl M, Brüske I, Möhner M, Nowak D, Schnelzer M, Walsh L. 2013. Silica dust, radon and death from non-malignant respiratory diseases in German uranium miners. *Occupational and Environmental Medicine*, 70(12), 869-875.
- Kreuzer M, Deffner V, Schnelzer M, Fenske N. 2021. Mortality in underground Miners in a former uranium ore mine - results of a cohort study among former employees of Wismut AG in Saxony and Thuringia. *Deutsches Ärzteblatt International*, 118:41-48.
- Kreuzer M, Deffner V, Sommer M, Fenske N. 2023. Updated risk models for lung cancer due to radon exposure in the German Wismut cohort of uranium miners, 1946–2018. *Radiation and Environmental Biophysics* (online first).
- Kreuzer M, Sommer M, Deffner V, Bertke S, Demers PA, Kelly-Reif K, Laurier D, Rage E, Richardson DB, Samet JM, Schubauer-Berigan MK, Tomasek L, Wiggins C, Zablotska LB, Fenske N. Lifetime excess absolute risk for lung cancer due to exposure to radon – results of the pooled uranium miners cohort study PUMA (submitted).
- Richardson DB, Rage E, Demers PA, Do MT, Fenske N, Deffner V, Kreuzer M, Samet J, Bertke S, Kelly-Reif K. 2022. Lung cancer and radon: pooled analysis of uranium miners hired in 1960 or later. *Environmental Health Perspectives*, 130(5), 057010.
- Sogl M, Taeger D, Pallapies D, Bruning T, Dufey F, Schnelzer M, Straif K, Walsh L, Kreuzer M. 2012. Quantitative relationship between silica exposure and lung cancer mortality in German uranium miners, 1946-2003. *British Journal of Cancer*, 107(7), 1188-1194.

### Website

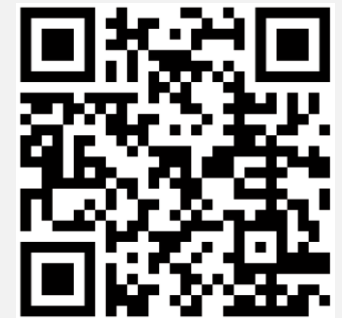

[www.bfs.de/wismut-studie](http://www.bfs.de/wismut-studie)

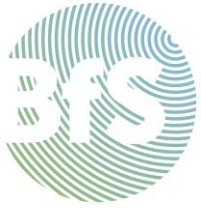

**Federal Office for  
Radiation Protection**

#### **Legal Notice**

Bundesamt für Strahlenschutz  
Postfach 10 01 49  
38201 Salzgitter

Tel.: +49 30 18333-0  
Fax: +49 30 18333-1885  
E-Mail: [ePost@bfs.de](mailto:ePost@bfs.de)

[www.bfs.de](http://www.bfs.de)

#### **Contact for questions**

Dr. Veronika Deffner  
[vdeffner@bfs.de](mailto:vdeffner@bfs.de)  
+49 30 18333-2251
