# Supplementary material for: Uranium mining – challenges and lessons to learn for nuclear disposal in view of participation and safety
Source: Copernicus journal article supplement (doi:10.5194/sand-2-255-2023), 2023-09-06
Supplement: Supplementary file 3 [file sand-2-255-2023-supplement.zip]

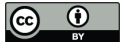

## *Supplement of*

# **Uranium mining – challenges and lessons to learn for nuclear disposal in view of participation and safety**

**Carlo Dietl et al.**

*Correspondence to:* Carlo Dietl ([carl.dietl@base.bund.de](mailto:carl.dietl@base.bund.de))

- sand-2-255-2023-supplement-title-page.pdf
- 12.00 Greenpeace visit to the Priargunskiy uranium works.pptx
- sand-2023-11\_2023-09-13\_Vortrag\_Uranbergarbeiter\_Kohortenstudie\_safeND\_VDeffner.pdf
- sand-2023-11\_Orleanu-2023 Berlin.pdf

The copyright of individual parts of the supplement might differ from the article licence.
